# Supplementary material for: A cryptic cycle in haematopoietic niches promotes initiation of malaria transmission and evasion of chemotherapy
Source: PubMed Central journal article supplement (PMC5924373; doi:10.1038/s41467-018-04108-9), 2018-04-27
Supplement: 41467_2018_4108_MOESM1_ESM.pdf [file 41467_2018_4108_MOESM1_ESM.pdf]

## 2 **Supplementary Methods**

3

### 4 **Optimisation of DNA staining of infected erythroid cells.**

5 Cells were stained with cypro-Ruby at various dilutions of stock dye at either 37 or  
6 4°C. Cells were subjected to FACS analysis after further staining with appropriate  
7 fluorescently-tagged antibodies and the DNA staining pattern of the CD45<sup>-/low</sup>,  
8 CD11b<sup>-</sup> and Ter119<sup>+</sup> populations analysed by FACS to determine the conditions  
9 under which intracellular parasites were not stained, as judged best by the  
10 peripheral blood plots. The optimal staining conditions was determined to be  
11 1:2000 dilution staining at 4°C.

12

### 13 **Infection of naïve animals with parasitised ER and EB**

14 100 GFP<sup>+</sup> ER and 100 GFP<sup>+</sup> EB were cell sorted from the spleen of mice infected with  
15 507 clone1. One hundred GFP<sup>+</sup> Ter119<sup>+</sup>CD44<sup>low</sup> cells were sorted from the peripheral  
16 blood of the same animal. The GFP<sup>+</sup> populations were injected into naïve BALB/c  
17 mice and parasitemia monitored

18

### 19 ***In vitro* reinvasion assay**

20 A erythrocyte invasion assay was performed as described previously<sup>38</sup>. Briefly,  
21 Nycodenz purified schizonts were stained with anti-Ter119 at a 6:100 concentration  
22 at room temperature for 3 mins before being washed with PBS (Gibco). Merozoites  
23 were released by rupturing schizonts by serially passing through a 5 µm (Acrodisc)  
24 and a 1.6 µm (Puradisc, Whatman) filter and adding to uninfected unstained blood  
25 (10% haematocrit). Cells were incubated at 37 °C and 1200 g for 10 mins before  
26 being added to schizont media. Samples were taken at various time points and  
27 analyzed by flow cytometry.

28

### 29 **Gametocyte enrichment with sulphadiazine**

30 Animals were phenylhydrazine-HCl (1.25 mg) treated prior to infection IP with  
31 PbGFP<sub>CON</sub>/RFP<sub>GAM</sub>. Sulphadiazine was administered to the drinking water of the  
32 animals when blood parasitemia reached >5%. Peripheral blood was recovered by  
33 cardiac puncture under anesthetic 48hrs post drug administration.

34

35

36

37 **Calculation of percent contribution of EB parasitemia to subsequent ER**  
38 **parasitemia/gametocytemia**

39 Total numbers of parasites in intermediate and mature EB were divided by the total  
40 numbers of ER parasites detected 24 hours later, to account for the rate of ER to EB  
41 transition and this number was multiplied by 100.

42

43

44 **Generation of 1137cl2**

45 DNA constructs for used in the genetic modification of *P. berghei* were prepared  
46 using standard molecular biology techniques. The *rfp* gene was amplified using a  
47 standard PCR reaction and a proofreading DNA polymerase from plasmid pG0161  
48 (unpublished). The pair of sense and anti-sense oligonucleotides had the restriction  
49 sites for XhoI and XmaI incorporated at the 5' end respectfully. Primers designed  
50 using CLC workbench 5.0 and ordered from Eurofins MWG operons (Ebersberg,  
51 Germany). To obtain the construct pPbRFP<sub>gam</sub> (pG403), the XhoI/XmaI flanked *cfp* in  
52 pG306<sup>1</sup> was exchanged for *rfp*. Plasmid pG306 contains the *cfp* under the control of  
53 the promoter of the early gametocyte marker PBANKA\_101270 with the *P45/48*  
54 *3'utr* downstream. The sequence of the open reading frame in each plasmid was  
55 validated by DNA sequencing (MWG eurofins) using appropriate primers. 15-30 µg of  
56 verified plasmid DNA was linearised with SacII and DNA purified.

57

58 **Transfection**

59 Transfection of PbGFP<sub>con</sub> parasites with linearized constructs, positive and negative  
60 selection and cloning of the PbGFP<sub>CON</sub>/RFP<sub>GAM</sub> were performed as previously  
61 described<sup>37,39,40</sup>. Briefly, 100ul nucleofector solution and 5-10ug linearised DNA were  
62 added to Nycodenz purified schizonts and electroporated using an Amaxa  
63 Nucleofector device set to program U-33. The parasites where injected I.V. into an  
64 uninfected animal. Pyrimethamine (70 µg/ ml) (Sigma) was administered in the  
65 drinking water of the animals one day pi and continued for 5 days. The construct's  
66 integration into the genome was checked by PCR construct (primer pairs 3'  
67 integration and 5' integration) and positive parasites were cloned before being  
68 negatively selected using 5-FC administered in the drinking water.

69

70

71

72

73

74

75

76

77

78

79

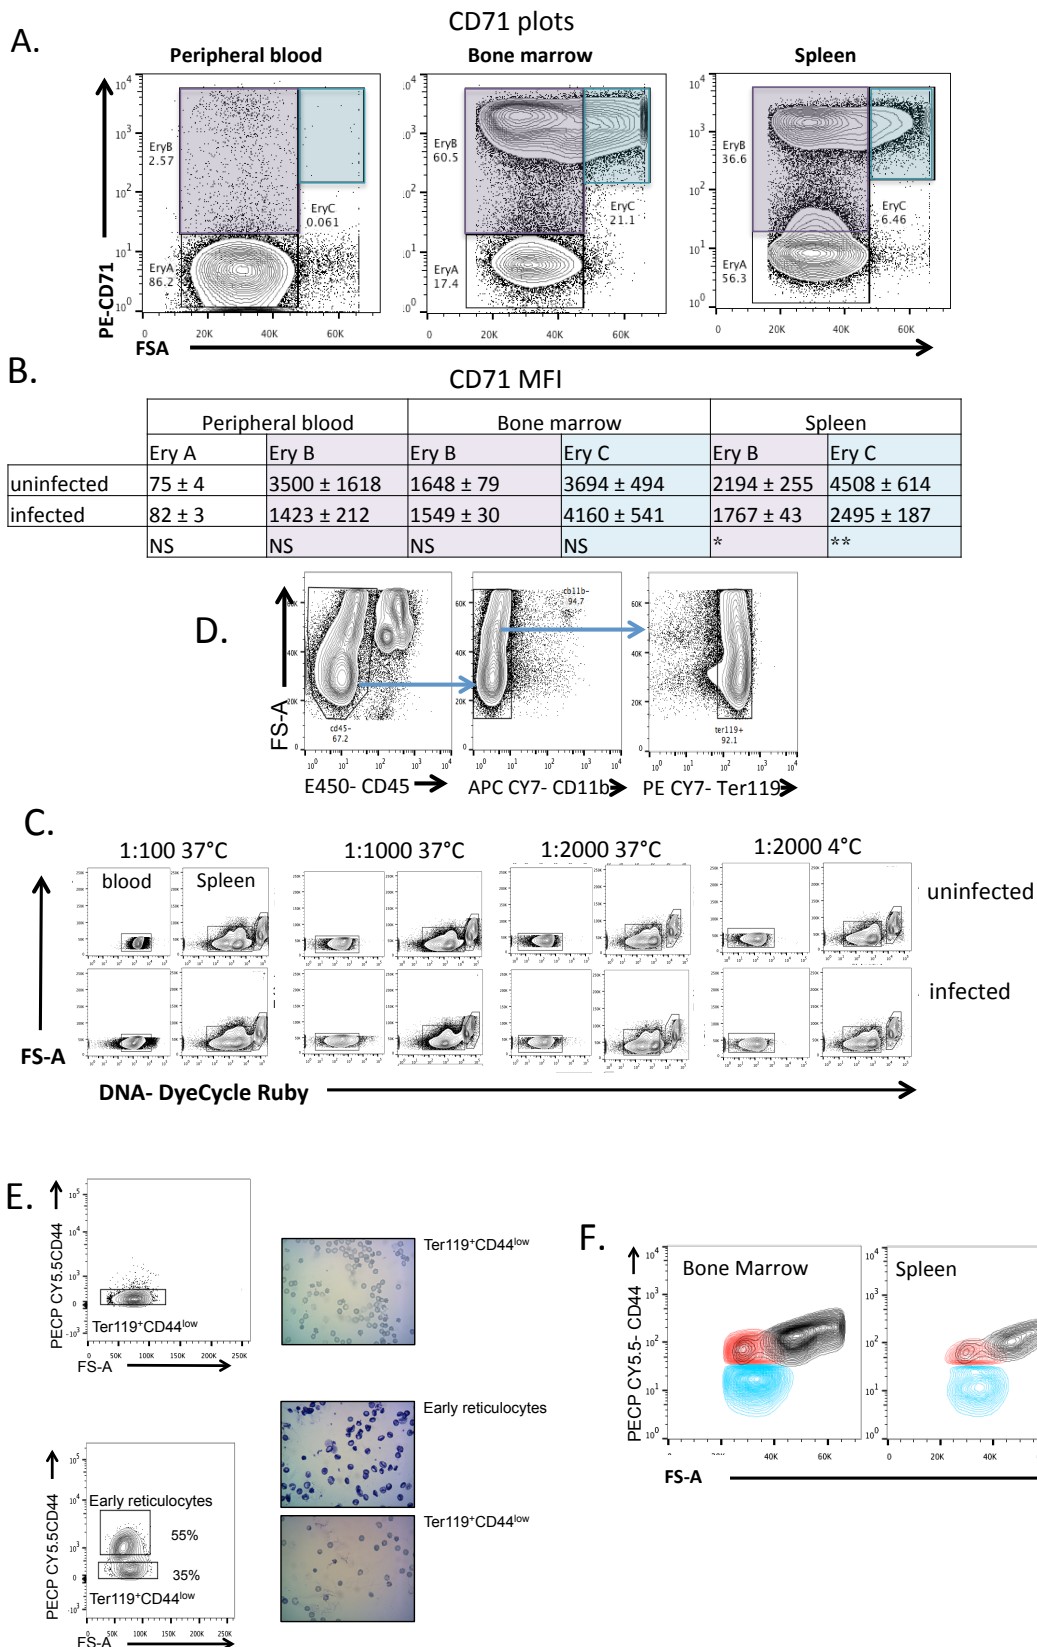

80

81

82

83 **Supplementary Figure 1. Flow analysis robustly detects *P. berghei*<sup>GFP</sup>-infected,**

84 **Ter119<sup>+</sup> CD44<sup>high</sup> erythroid cells. A. Representative FACS plots showing CD45<sup>-</sup> and**

85 Ter119<sup>+</sup> cells from tissues and peripheral blood gated against CD71 and FS-A. **B.** MFI  
86 of CD71 within uninfected and infected *P. berghei* samples. MFI values are the  
87 average intensities within the indicated gates P values are \* <0.1, \*\* <0.01. **C.**  
88 Optimisation of DNA staining of infected EB cells. Representative FACS plots of DNA  
89 stain titration. Dye concentrations and staining temperature are indicated. For each  
90 condition there is a representative plot for uninfected (U) and infected (I) peripheral  
91 blood (Left) and spleen (Right). Cells shown on these plots are pre-gated as CD45<sup>-/low</sup>,  
92 CD11b<sup>-</sup> and Ter119<sup>+</sup>. Gates were set on the uninfected samples then imposed onto  
93 the corresponding infected sample. **D.** Representative FACS gating strategy for bone  
94 marrow and splenic resident erythroid precursors in uninfected and *P. berghei*  
95 infected animals. Erythroid cells were identified by gating CD45<sup>-/low</sup>, CD11b<sup>-</sup> and  
96 Ter119<sup>+</sup>. **E.** Early reticulocyte and erythroblast populations superimposed. Note the  
97 overlap in erythroblast and early reticulocyte size. **F.** Ter119<sup>+</sup>CD44<sup>low</sup> cells were cell  
98 sorted from bone marrow and peripheral blood. All contain pale Giesma stained  
99 cells. Early reticulocytes sorted from both organs contain dark blue cells.  
100 Representative FACS plots and imaging from uninfected bone marrow.

101

102

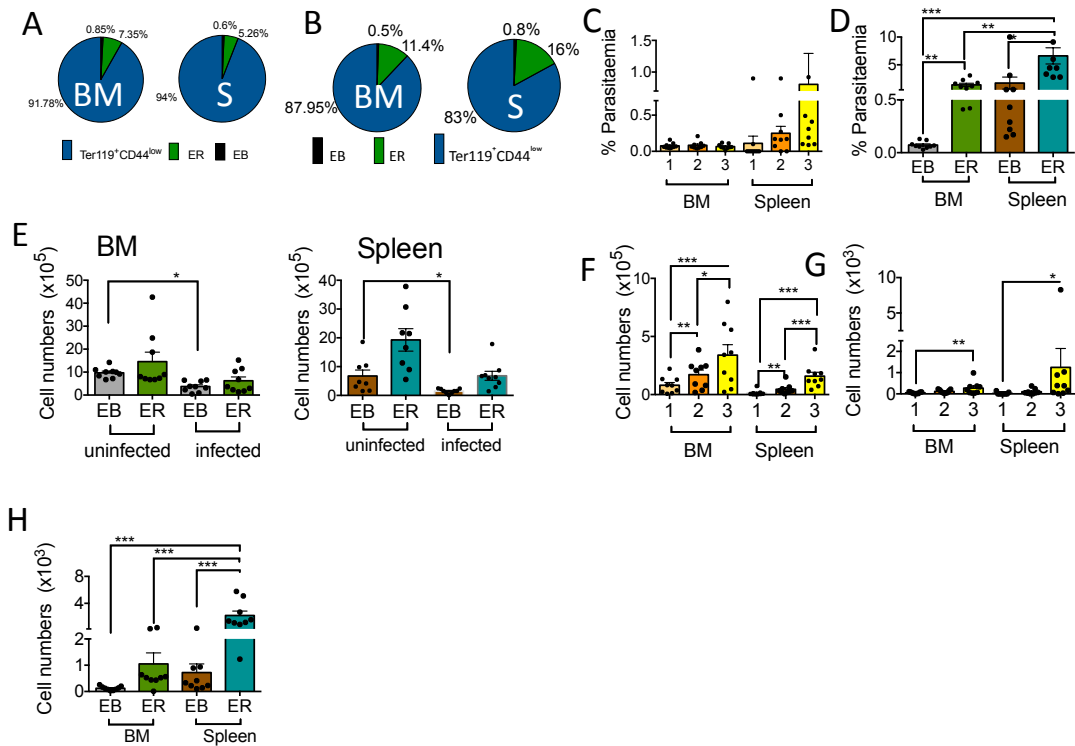

103

104

**Supplementary Figure 2: Infection characteristics of *P. berghei* (PbGFP<sub>con</sub>) in bone marrow and spleen are independent of host strain.**

105

Pie chart showing the percentage distribution of parasites within the bone marrow (BM) and the spleen (S)

106

of BALB/c (A) and NIH (B) mice. C. Percentage parasitemia of erythroblast stages (1-3

107

as defined in Figure 1) in the bone marrow (BM) and spleen in NIH outbred mice. Error bars  $\pm$  SD. n = 6.

108

D. Percentage parasitemia of erythroblasts (EB) and early reticulocytes (ER) in the bone marrow (BM) and spleen in NIH mice. Error bars  $\pm$  SEM. n = 6.

109

E. Whole cell numbers of total erythroblasts (EB) and early reticulocytes (ER) in bone marrow (BM) and spleen of uninfected and infected NIH mice. Error bars  $\pm$  SEM. n = 6.

110

F. Whole cell numbers of total erythroblast stages in infected bone marrow (BM) and spleen in NIH mice. Error bars  $\pm$  SEM. n = 6.

111

G. Whole cell numbers of infected erythroblast stages in the bone marrow (BM) and spleen of NIH mice. Error bars  $\pm$  SEM. n = 6.

112

H. Whole cell numbers of infected erythroblast (EB) and early reticulocyte (ER) compartment in the bone marrow (BM) and spleen of NIH mice. Error bars  $\pm$  SEM. n = 6. Significant differences mentioned above were

113

assessed by one way ANOVA alongside Dunnett's multiple comparisons test and indicated with asterisks: \* p < 0.05, \*\* p < 0.01, \*\*\* p < 0.001, \*\*\*\* p < 0.0001.

114

115

116

117

118

119

120

121

122

123

124

125

126



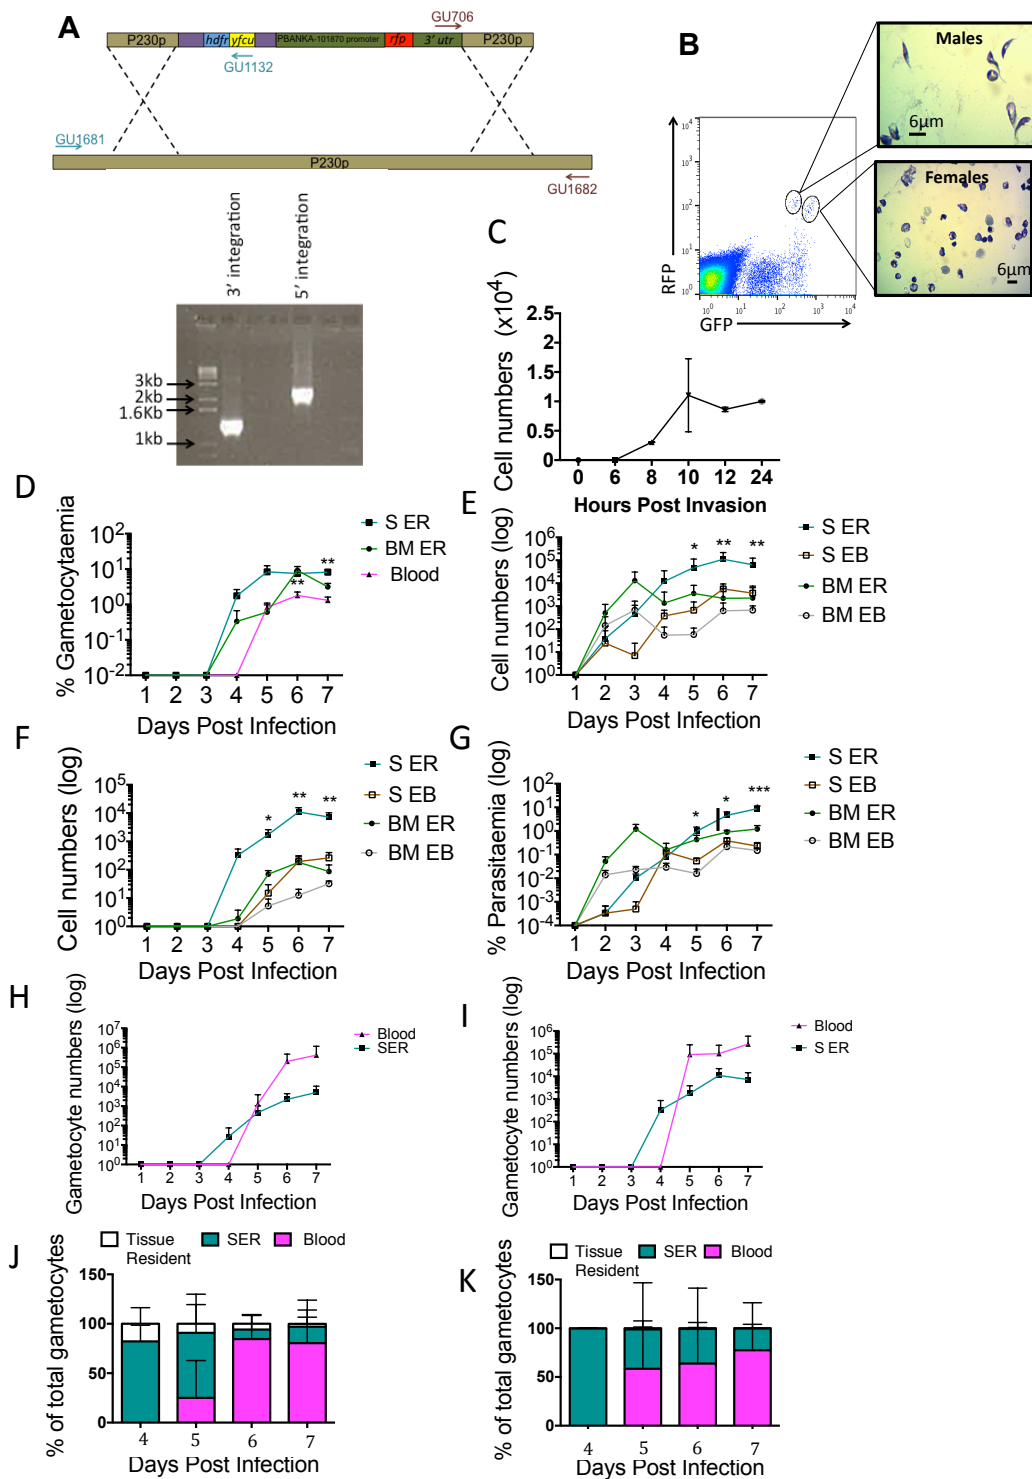

127

128

129 **Supplementary Figure 3: Generation of gametocyte RFP proxy and gametocyte**

130 **localisation within hematopoietic niches. A.** Schematic of integration with genetic

131 elements labeled. Agarose gel showing correct integration of the linearised pG403

132 into the *P230p* locus, creating the PbGFP<sub>CON</sub>/RFP<sub>Gam</sub> clonal parasite line. Expected

133 fragment sizes: 3' integration 1.3kb; 5' integration 2.5kb. **B.** Mice infected with

134 PbGFP<sub>CON</sub>/RFP<sub>Gam</sub> where treated with sulphadiazine and the two GFP<sup>+</sup>RFP<sup>+</sup>

135 populations in the peripheral blood were sorted 48hrs later. The two populations of  
136 gametocytes were activated at room temperature and the resulting gametes were  
137 visualised under a light microscope. The populations were contained exclusively  
138 male (GFP<sup>+</sup>RFP<sup>+</sup>) or female (GFP<sup>++</sup>RFP<sup>+</sup>) gametes. **C.** Total whole numbers of  
139 gametocytes present in culture post *in vitro* reinvasion assay. RFP was initially  
140 detectable by flow cytometry from 8hrs – 12hrs post invasion (n=3). **D.** Percentage  
141 gametocytemia of splenic and bone marrow derived early reticulocytes in NIH mice.  
142 **E.** Splenic early reticulocytes have a significantly higher percentage parasitemia from  
143 day 5 pi in NIH mice. **F.** Whole cell numbers of gametocytes in splenic and bone  
144 marrow derived erythroblasts of NIH mice. **G.** Whole cell numbers of asexual  
145 parasites in splenic and bone marrow derived erythroblasts of NIH mice. **H/I** Whole  
146 cell numbers of gametocytes in the peripheral blood and splenic early reticulocytes  
147 in balb/c (**H**) and NIH mice (**I**). BALB/c Day1-Day6 n=9, Day7=9; NIH all n=6. ±SEM.  
148 **J/K.** The proportion the gametocytes within the peripheral blood, splenic early  
149 reticulocytes and all remaining tissue resident compartments (BM ER, EB and S EB)  
150 contribute to the overall total gametocyte burden in balb/c (**J**) and NIH (**K**) mice.  
151 Significant differences mentioned above were assessed by one way ANOVA  
152 alongside Dunnett's multiple comparisons test and indicated with asterisks: \* p <  
153 0.05, \*\* p < 0.01, \*\*\* p < 0.001, \*\*\*\* p < 0.0001.

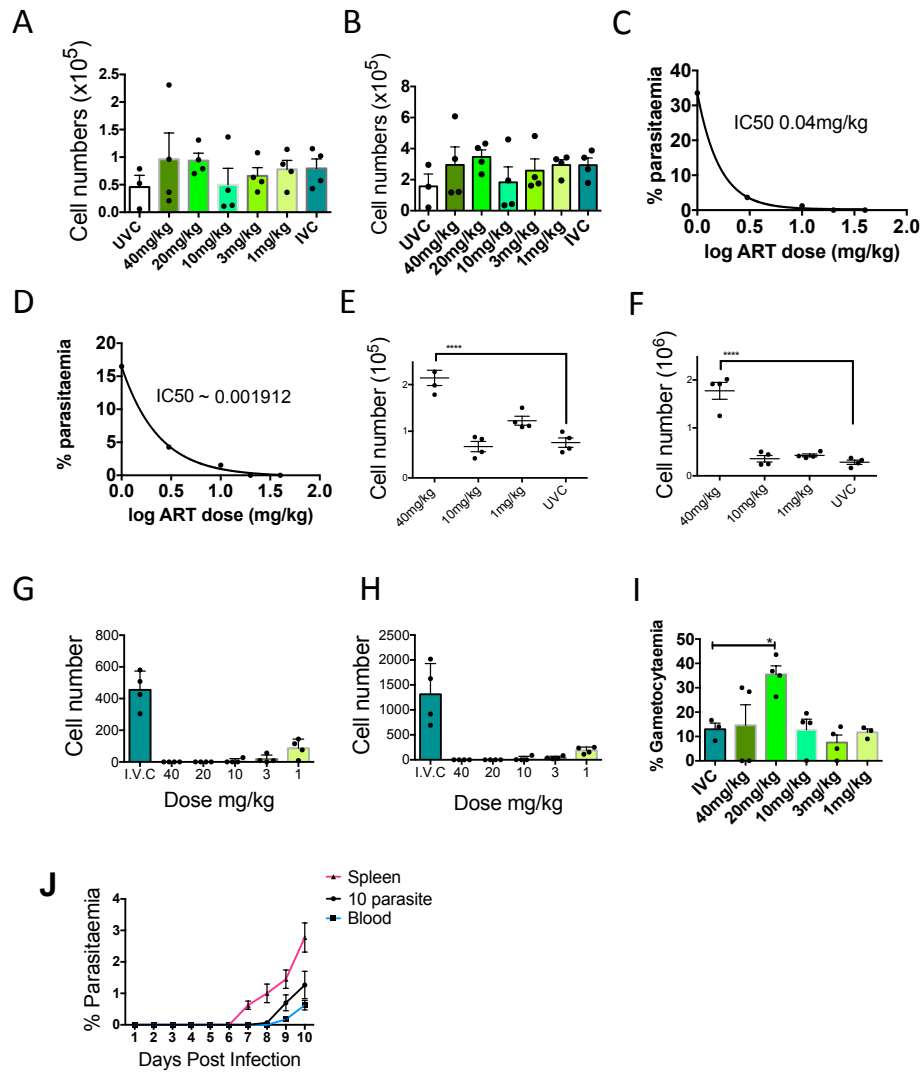

154

155 **Supplementary Figure 4: Impact of drug treatment (ART and CQ) on erythropoiesis**  
 156 **and parasitemia.** ART treatment did not stimulate increased numbers of bone  
 157 marrow **A.** early reticulocytes or **B.** erythroblasts compared with uninfected vehicle  
 158 control (UVC) mice. Drug response curve of parasites to ART in the **C.** blood and **D.**  
 159 bone marrow; graphs show percentage growth relative to infected vehicle control on  
 160 day 4 post infection. n = 4. **E.** Erythroblasts and **F.** Early reticulocytes compared with

161 vehicle control. **G.** Parasite numbers in the erythroblasts of the bone marrow after  
 162 ART treatment. **H.** Parasite numbers in the early reticulocytes of the bone marrow  
 163 after ART treatment. **I.** Gametocytemia of splenic ER treated with ART. Uninfected  
 164 mice treated with ART present a dose-dependent increase in splenic. **J.** The spleens  
 165 were harvested from 40 mg/kg ART treated mice on day 4 pi and a single cell  
 166 suspension passaged IP into naïve animals. Peripheral blood was harvested from the  
 167 treated animals and also passaged IP. 10 parasites were passaged IP from infected  
 168 vehicle control. n=4. Significant differences mentioned above were assessed by one  
 169 way ANOVA alongside Dunnett's multiple comparisons test and indicated with  
 170 asterisks: \* p < 0.05, \*\* p < 0.01, \*\*\* p < 0.001, \*\*\*\* p < 0.0001.

171  
 172  
 173  
 174  
 175  
 176

**Supplementary Table 1.** MFI of CD44 within uninfected and infected *P. berghei* samples.

| CD44 MFI   |                  |             |           |           |           |
|------------|------------------|-------------|-----------|-----------|-----------|
|            | Peripheral blood | Bone marrow |           | Spleen    |           |
|            |                  | ER          | EB        | ER        | EB        |
| uninfected | 19 ± 14          | 99 ± 60     | 180 ± 98  | 45.7 ± 19 | 128 ± 177 |
| infected   | 20 ± 14          | 100 ± 60    | 203 ± 126 | 45.9 ± 19 | 64 ± 37   |
|            | NS               | NS          | NS        | NS        | NS        |

177  
 178  
 179  
 180  
 181  
 182  
 183  
 184  
 185

**Supplementary Table 2.** Mean percentage contribution of EB asexual and gametocytes parasites to ER asexual and gametocytes parasite numbers in NIH mice.

187

| Days post infection | Contribution of EB to ER asexual parasites (%) $\pm$ SD | Contribution of EB to ER gametocytes (%) $\pm$ SD |
|---------------------|---------------------------------------------------------|---------------------------------------------------|
| 2                   | ND                                                      | ND                                                |
| 3                   | ND                                                      | ND                                                |
| 4                   | ND                                                      | ND                                                |
| 5                   | 9.92 $\pm$ 14                                           | ND                                                |
| 6                   | 0.8 $\pm$ 0.8                                           | 0.6 $\pm$ 0.1                                     |
| 7                   | 5.81 $\pm$ 5                                            | 10 $\pm$ 19                                       |

189

190

191

192 Legend: Total number of parasites in intermediate and mature EB were divided by  
 193 the total number of ER parasites at the ensuing 24 hr time point then multiplying by  
 194 100. ND = Not Detected.

195

196

197 **Supplementary Table 3.** Oligonucleotides used in this study.

198

| Pair name      | Primer ID | Sequence                                     |
|----------------|-----------|----------------------------------------------|
| 3' integration | GU1682    | CATAAACGGTTTATTTAAAGTCATTTTTGG               |
|                | GU706     | CGACTAGTCCCGGGCTTAACATTCACATATATTAATAATTTAAT |
| 5' integration | GU1681    | TAGTTAGCTTAAATTGTCCAAGTGG                    |
|                | GU1132    | GGTATTCTGGCAGAAG                             |
|                | GU1681    | TAGTTAGCTTAAATTGTCCAAGTGG                    |
|                | GU1682    | CATAAACGGTTTATTTAAAGTCATTTTTGG               |

199
